# Supplementary material for: Differences in genome-wide gene expression response in peripheral blood mononuclear cells between young and old men upon caloric restriction
Source: PubMed Central journal article supplement (PMC4968441; doi:10.1186/s12263-016-0528-0), 2016-05-06
Supplement: 12263_2016_528_MOESM1_ESM.pdf [file 12263_2016_528_MOESM1_ESM.pdf]

| Upstream regulator | Function                | Baseline<br>(Old vs Young) |         | Young    |         | Old     |          |   |                 |
|--------------------|-------------------------|----------------------------|---------|----------|---------|---------|----------|---|-----------------|
|                    |                         | z-score                    | p-value | z-score  | p-value | z-score | p-value  |   |                 |
| <b>IFNL1</b>       | Cytokine                | ↑                          | 2.630   | 4.94E-03 | -       | -1.929  | 2.25E-03 | - | -               |
| <b>IFNA2</b>       | Cytokine                | ↑                          | 3.272   | 1.68E-04 | ↓       | -3.138  | 1.08E-03 | - | -               |
| <b>IFNG</b>        | Cytokine                | ↑                          | 2.934   | 1.85E-05 | ↓       | -2.052  | 1.40E-02 | - | 0.792 3.48E-02  |
| <b>EIF2AK2</b>     | Kinase                  | -                          | -       | -        | ↓       | -2.828  | 1.10E-02 | - | -               |
| <b>MAPK1</b>       | Kinase                  | ↓                          | -2.985  | 1.12E-01 | ↑       | 3.63    | 1.19E-02 | - | -               |
| <b>GAPDH</b>       | Enzyme                  | -                          | -       | -        | ↑       | 2.433   | 6.81E-03 | - | -               |
| <b>TGM2</b>        | Enzyme                  | -                          | 0.112   | 1.11E+00 | ↓       | -4.375  | 1.23E-03 | - | -               |
| <b>PDGF BB</b>     | Complex                 | -                          | -       | -        | -       | -       | -        | ↓ | -4.026 5.16E-09 |
| <b>ERK</b>         | Group                   | -                          | -       | -        | -       | -       | -        | ↓ | -3.538 7.29E-04 |
| <b>CCL5</b>        | Cytokine                | -                          | -       | -        | -       | -       | -        | ↓ | -2.985 6.15E-04 |
| <b>Jnk</b>         | Group                   | -                          | -       | -        | -       | -       | -        | ↓ | -2.960 3.71E-03 |
| <b>F7</b>          | Peptidase               | -                          | -       | -        | -       | -       | -        | ↓ | -2.772 9.95E-05 |
| <b>CSF2</b>        | Cytokine                | -                          | -       | -        | -       | -       | -        | ↓ | -2.722 3.14E-04 |
| <b>STAT3</b>       | Transcription regulator | -                          | -       | -        | -       | -       | -        | ↓ | -2.598 1.19E-04 |
| <b>ERK1/2</b>      | Group                   | -                          | -       | -        | -       | -       | -        | ↓ | -2.256 2.79E-03 |
| <b>TNF</b>         | Cytokine                | -                          | 0.870   | 8.23E-03 | -       | -1.993  | 0.261    | ↓ | -2.219 5.28E-03 |
| <b>P38 MAPK</b>    | Group                   | -                          | -       | -        | -       | -       | -        | ↓ | -2.131 1.21E-02 |
| <b>EGF</b>         | Growth factor           | -                          | -       | -        | -       | -       | -        | ↓ | -2.072 1.53E-02 |
| <b>IL1</b>         | Group                   | -                          | -       | -        | -       | -       | -        | ↓ | -2.000 1.33E-02 |
| <b>COL18A1</b>     | Other                   | -                          | -       | -        | -       | -       | -        | ↑ | 3.000 1.70E-02  |
| <b>CD24</b>        | Other                   | -                          | -       | -        | ↑       | 2.236   | 6.20E-02 | ↑ | 2.121 6.39E-03  |
| <b>TAB1</b>        | Enzyme                  | -                          | -       | 4.05E-02 | -       | -       | -        | ↑ | 2.000 4.02E-02  |

↑: activated; ↓: inhibited; -: not activated/inhibited;

Black text: regulator is present in dataset and z-score is below -2 or above 2 with p-value<0.05

Grey text: regulator is present in dataset, but z-score is above -2 or below 2, or P-value is>0.05
